# Supplementary material for: Genomic characterization of co-existing neoplasia and carcinoma lesions reveals distinct evolutionary paths of gallbladder cancer
Source: PubMed Central journal article supplement (PMC8346570; doi:10.1038/s41467-021-25012-9), 2021-08-06
Supplement: 41467_2021_25012_MOESM2_ESM.pdf [file 41467_2021_25012_MOESM2_ESM.pdf]

## **Description of Additional Supplementary Files**

File name: Supplementary Data 1

Description: The clinical and sample information of the gallbladder cancer patients included in this study.

File name: Supplementary Data 2

Description: Somatic mutations identified in this study.

File name: Supplementary Data 3

Description: Information about the mutations selected for experimental validation.

File name: Supplementary Data 4

Description: GBC evolutionary group assignment based on mutations, SCNAs or LOH.

File name: Supplementary Data 5

Description: Jaccard similarity scores for tumor samples in this study.
